# Supplementary material for: Buffalo Whey-Based Cocoa Beverages with Unconventional Plant-Based Flours: The Effect of Information and Taste on Consumer Perception
Source: MDPI journal article supplement (doi:10.3390/beverages9040090), 2023-10-31
Supplement: s1 [file s1]

**Supplementary Materials:**

**Table S1.** Cow and buffalo whey proximal composition (means  $\pm$  SD).

| Whey type           | Proximal composition |                 |                 |                 |                 | Solids not fat  |
|---------------------|----------------------|-----------------|-----------------|-----------------|-----------------|-----------------|
|                     | Fat                  | Protein         | Lactose         | Minerals        | Total solids    |                 |
| <b>Cow whey</b>     | 0.59 $\pm$ 0.01      | 2.69 $\pm$ 0.01 | 4.02 $\pm$ 0.01 | 0.59 $\pm$ 0.00 | 7.89 $\pm$ 0.02 | 7.31 $\pm$ 0.02 |
| <b>Buffalo whey</b> | 0.35 $\pm$ 0.01      | 2.86 $\pm$ 0.01 | 4.27 $\pm$ 0.01 | 0.63 $\pm$ 0.00 | 8.10 $\pm$ 0.01 | 7.75 $\pm$ 0.02 |

**Table S2.** Formulation of cow and buffalo whey-based cocoa beverage.

| Ingredient            | BCC <sup>1</sup> | BCE  | BFA  | BFB  | BFH  |
|-----------------------|------------------|------|------|------|------|
| <b>Cow whey</b>       | 88.75            | ---  | ---  | ---  | ---  |
| <b>Buffalo whey</b>   | ---              | 86.5 | 84.0 | 84.0 | 84.0 |
| <b>Xanthan gum</b>    | 0.25             | ---  | ---  | ---  | ---  |
| <b>Inulin</b>         | ---              | 2.5  | 2.5  | 2.5  | 2.5  |
| <b>Sugar</b>          | 3.5              | ---  | ---  | ---  | ---  |
| <b>Xylitol</b>        | ---              | 3.5  | 3.5  | 3.5  | 3.5  |
| <b>Cocoa 100 %</b>    | 7.5              | ---  | ---  | ---  | ---  |
| <b>Cocoa 50 %</b>     | ---              | 7.5  | 7.5  | 7.5  | 7.5  |
| <b>Açaí flour</b>     | ---              | ---  | 2.5  | ---  | ---  |
| <b>Beetroot flour</b> | ---              | ---  | ---  | 2.5  | ---  |
| <b>Hibiscus flour</b> | ---              | ---  | ---  | ---  | 2.5  |

<sup>1</sup> BCC = control commercial formulation; BCE = control experimental formulation; BFA = dessert with açaí flour; BFB = dessert with beetroot flour; BFH = dessert with hibiscus flour.

**Table S3.** Attributes evaluated with definition.

| Attributes                | Definitions                                                                                                    |
|---------------------------|----------------------------------------------------------------------------------------------------------------|
| <b>Appearance</b>         | Physical characteristics perceptible with the sense of vision such as color intensity, luminosity, and texture |
| <b>Color</b>              | Result of physical and physiological characteristics of chemical compounds                                     |
| <b>Odor</b>               | Volatile particles are detected in the nasal passage and are perceived by the olfactory system                 |
| <b>Flavor</b>             | The sensation is obtained by the perception of the olfactory and oral systems.                                 |
| <b>Consistency</b>        | Characteristic of a liquid having the property of resistance to flow                                           |
| <b>Mouthfeel</b>          | Physical characteristics perceptible in the mouth by the consumer such as texture, viscosity, and consistency  |
| <b>Overall liking</b>     | The result of the set of perception or acceptance of all attributes                                            |
| <b>Purchase intention</b> | The probability that the consumer will buy the tested product, is influenced by the rest of the attributes     |

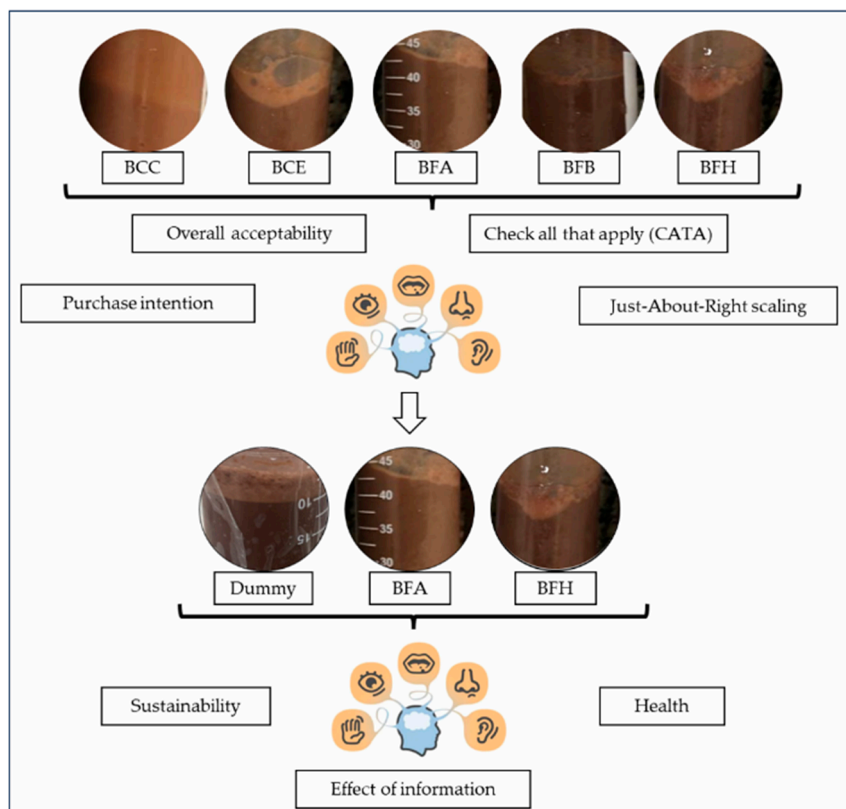

**Figure S1.** Study design illustrating the stages involved in the experiment. BCC = control commercial formulation; BCE = control experimental formulation; BFA = dessert with açai flour; BFB = dessert with beetroot flour; BFH = dessert with hibiscus flour.
